# Supplementary material for: Computed Tomography Structured Reporting in the Staging of Lymphoma: A Delphi Consensus Proposal
Source: MDPI journal article supplement (doi:10.3390/jcm10174007), 2021-09-04
Supplement: s1 [file s1]

Supplementary Materials

PATIENT CLINICAL DATA

| FIELD                                                                                    | DETAIL                                                 | ADMITTED VALUES                                                                                                                                                                                                       |
|------------------------------------------------------------------------------------------|--------------------------------------------------------|-----------------------------------------------------------------------------------------------------------------------------------------------------------------------------------------------------------------------|
| ANTHROPOMETRIC DATA                                                                      |                                                        |                                                                                                                                                                                                                       |
| Weight                                                                                   |                                                        | (kg) [Numeric]                                                                                                                                                                                                        |
| Height                                                                                   |                                                        | (cm) [Numeric]                                                                                                                                                                                                        |
| BMI                                                                                      |                                                        | [Numeric] (automatically calculated)                                                                                                                                                                                  |
| BSA                                                                                      |                                                        | [Numeric] (automatically calculated)                                                                                                                                                                                  |
| Age                                                                                      |                                                        | (years) [Numeric]                                                                                                                                                                                                     |
| Age range                                                                                |                                                        | <ul style="list-style-type: none"><li>&lt; 50 years</li><li>&gt; 50 years</li></ul>                                                                                                                                   |
| PATIENT HISTORY                                                                          |                                                        |                                                                                                                                                                                                                       |
| Family history of cancer<br><small>(visible only if “Yes” and repeatable)</small>        | Yes/No                                                 |                                                                                                                                                                                                                       |
|                                                                                          | Degree of kinship                                      | <ul style="list-style-type: none"><li>Mother</li><li>Father</li><li>Brother(s)/sister(s)</li><li>Maternal grandparent(s)</li><li>Paternal grandparent(s)</li><li>Uncle(s)/aunt(s)</li><li>Other [free text]</li></ul> |
|                                                                                          | Notes                                                  | [free text]                                                                                                                                                                                                           |
|                                                                                          |                                                        |                                                                                                                                                                                                                       |
| Personal history of other cancers                                                        | Yes/No                                                 |                                                                                                                                                                                                                       |
|                                                                                          | Notes                                                  | [free text]                                                                                                                                                                                                           |
|                                                                                          |                                                        |                                                                                                                                                                                                                       |
| <u>Lifestyle/dietary habits</u><br><small>(visible only if “Yes” and repeatable)</small> | Smoke                                                  | Yes/No                                                                                                                                                                                                                |
|                                                                                          | <u>SMOKING DETAILS</u> (visible only if Smoke = “Yes”) |                                                                                                                                                                                                                       |
|                                                                                          | Smoker                                                 | <ul style="list-style-type: none"><li>Current smoker</li><li>Former smoker</li></ul>                                                                                                                                  |
|                                                                                          | Cigarette smoke                                        | Yes/No                                                                                                                                                                                                                |
|                                                                                          | Number of daily cigarettes (if “Current smoker”)       | <ul style="list-style-type: none"><li>Light (&lt; 15)</li><li>Heavy (≥15)</li></ul>                                                                                                                                   |

|                                                                                    |                                                                                   |                                                                                                                                                            |  |
|------------------------------------------------------------------------------------|-----------------------------------------------------------------------------------|------------------------------------------------------------------------------------------------------------------------------------------------------------|--|
|                                                                                    | Smoking years                                                                     | [Numeric]                                                                                                                                                  |  |
|                                                                                    | Years from cessation<br>(if "Former smoker")                                      | <ul style="list-style-type: none"> <li>≤ 15</li> <li>&gt;15</li> </ul>                                                                                     |  |
|                                                                                    | Cigarettes per year<br>(pack-year)<br>(if "Former smoker" or<br>"Current smoker") | [Numeric]<br>(automatically calculated)*<br><br>*(Number of daily<br>cigarettes x smoking years<br>/ 20)                                                   |  |
|                                                                                    | Vaping                                                                            | Yes/No                                                                                                                                                     |  |
|                                                                                    | Number of daily<br>electronic cigarettes<br>refills (if vaping = "Yes")           | [Numeric]                                                                                                                                                  |  |
|                                                                                    | Number of years<br>(if vaping = "Yes")                                            | [Numeric]                                                                                                                                                  |  |
|                                                                                    | Notes                                                                             | [free text]                                                                                                                                                |  |
|                                                                                    | High alcohol intake                                                               | Yes more than 1 glass/day for women and 2 glasses/day for<br>men)<br><br>No                                                                                |  |
|                                                                                    | High meat intake                                                                  | Yes (white or red meat intake more than 3 times/week)<br><br>No                                                                                            |  |
|                                                                                    | High cured meat intake                                                            | Yes *(cured meat intake more than once a week)<br><br>No                                                                                                   |  |
|                                                                                    | Low vegetable intake                                                              | Yes *(less than 2 servings/day)<br><br>No                                                                                                                  |  |
|                                                                                    | Low fruit intake                                                                  | Yes *(less than 3 whole fruits/day)<br><br>No                                                                                                              |  |
|                                                                                    | Notes                                                                             | [free text]                                                                                                                                                |  |
|                                                                                    | ALLERGIES AND ADVERSE REACTIONS                                                   |                                                                                                                                                            |  |
|                                                                                    | Reported allergies<br><br>(visible only if "Yes" and repeatable)                  | Yes/No                                                                                                                                                     |  |
| Type                                                                               |                                                                                   | <ul style="list-style-type: none"> <li>Drug-related (n of drugs)</li> <li>Contrast medium-related (n of contrast media)</li> <li>Drug-unrelated</li> </ul> |  |
| Active principle/molecule<br><br>[if drug- or contrast medium-<br>related allergy] | [free text]                                                                       |                                                                                                                                                            |  |

|                                                                      |                                                                  |                                                                                                                                                                                                                           |
|----------------------------------------------------------------------|------------------------------------------------------------------|---------------------------------------------------------------------------------------------------------------------------------------------------------------------------------------------------------------------------|
| PREVIOUS adverse reactions<br>(visible only if “Yes” and repeatable) | Commercial name<br>[if drug- or contrast medium-related allergy] | <i>[free text]</i>                                                                                                                                                                                                        |
|                                                                      | Notes                                                            | <i>[free text]</i>                                                                                                                                                                                                        |
|                                                                      | Yes/No                                                           |                                                                                                                                                                                                                           |
|                                                                      | Date                                                             | month/year [mm/yyyy]                                                                                                                                                                                                      |
|                                                                      | Type                                                             | Contrast medium-related / unrelated                                                                                                                                                                                       |
|                                                                      | Degree                                                           | <ul style="list-style-type: none"> <li>• Mild</li> <li>• Moderate</li> <li>• Severe</li> </ul>                                                                                                                            |
|                                                                      | Time of onset                                                    | <ul style="list-style-type: none"> <li>• Early</li> <li>• Late</li> </ul>                                                                                                                                                 |
|                                                                      | Notes                                                            | <i>[free text]</i>                                                                                                                                                                                                        |
|                                                                      | Yes/No                                                           |                                                                                                                                                                                                                           |
| Antiallergic premedication                                           | Treatment                                                        | <ul style="list-style-type: none"> <li>• Steroid</li> <li>• Antihistamine</li> </ul>                                                                                                                                      |
|                                                                      | Complete                                                         | Yes/No                                                                                                                                                                                                                    |
|                                                                      | Notes                                                            | <i>[free text]</i>                                                                                                                                                                                                        |
|                                                                      | Yes/No                                                           |                                                                                                                                                                                                                           |
| Nephroprotective protocol                                            | Complete                                                         | Yes/No                                                                                                                                                                                                                    |
|                                                                      | Serum creatinine                                                 | <i>[Numeric]</i> (mg/dl)                                                                                                                                                                                                  |
|                                                                      | GFR (Glomerular Filtration Rate)                                 | <i>[Numeric]</i> (ml/min)<br><br><a href="https://www.merckmanuals.com/medical-calculators/GFR_CKD_EPI-it.htm">https://www.merckmanuals.com/medical-calculators/GFR_CKD_EPI-it.htm</a> (sex, race, age, serum creatinine) |
|                                                                      | Notes                                                            | <i>[free text]</i>                                                                                                                                                                                                        |

## CLINICAL EVALUATION

| FIELD                     | DETAIL                                                            | ADMITTED VALUES                                                                                                                                                                                                                                                                                 |
|---------------------------|-------------------------------------------------------------------|-------------------------------------------------------------------------------------------------------------------------------------------------------------------------------------------------------------------------------------------------------------------------------------------------|
| CLINICAL INFORMATION      | Yes/No                                                            |                                                                                                                                                                                                                                                                                                 |
|                           | Prior imaging tests<br>(visible only if “Yes” and repeatable)     | <ul style="list-style-type: none"><li>CT</li><li>MRI</li><li>Ultrasound</li><li>PET-CT</li><li>Other [free text]</li></ul>                                                                                                                                                                      |
|                           | Date                                                              | [dd/mm/yyyy]                                                                                                                                                                                                                                                                                    |
|                           | Notes                                                             | [free text]                                                                                                                                                                                                                                                                                     |
|                           | CLINICAL PRESENTATION                                             |                                                                                                                                                                                                                                                                                                 |
| Patient general condition | <ul style="list-style-type: none"><li>Good</li><li>Poor</li></ul> |                                                                                                                                                                                                                                                                                                 |
|                           | Symptoms                                                          | <ul style="list-style-type: none"><li>Painless lymphadenopathies (e.g., neck, underarm, groin, etc.)</li><li>Fever and/or night sweats</li><li>Unexplainable weight loss for at least 6 months</li><li>Itching and/or pain triggered by alcohol intake (HL)</li><li>Other [free text]</li></ul> |
| Biopsy                    | Yes/No<br>If Yes:                                                 |                                                                                                                                                                                                                                                                                                 |
|                           |                                                                   | <ul style="list-style-type: none"><li>Bone marrow biopsy (date [mm/yyyy])</li><li>Other [free text], date [mm/yyyy]</li></ul>                                                                                                                                                                   |
|                           | Diagnosis (incl. immunohistotype)                                 | [free text]                                                                                                                                                                                                                                                                                     |
| CEA level                 |                                                                   | [Numeric]                                                                                                                                                                                                                                                                                       |
| Blood count               |                                                                   | [Numeric]                                                                                                                                                                                                                                                                                       |
| Serum creatinine          |                                                                   | [Numeric]                                                                                                                                                                                                                                                                                       |
| Liver function            |                                                                   | <ul style="list-style-type: none"><li>Normal</li><li>Impaired</li></ul>                                                                                                                                                                                                                         |
| Virology tests            |                                                                   | <ul style="list-style-type: none"><li>HBV (+/-)</li></ul>                                                                                                                                                                                                                                       |

|  |       |                                                                                                                        |
|--|-------|------------------------------------------------------------------------------------------------------------------------|
|  |       | <ul style="list-style-type: none"> <li>• HCV (+/-)</li> <li>• HIV (+/-)</li> <li>• Other <i>[free text]</i></li> </ul> |
|  | Notes | <i>[free text]</i>                                                                                                     |

## IMAGING PROTOCOL

| FIELD                   | DETAIL                                                                         | ADMITTED VALUES                                                                                                                                                                                                                                                                                       |
|-------------------------|--------------------------------------------------------------------------------|-------------------------------------------------------------------------------------------------------------------------------------------------------------------------------------------------------------------------------------------------------------------------------------------------------|
| IMAGING DATA            |                                                                                |                                                                                                                                                                                                                                                                                                       |
| Date of examination     |                                                                                | Date <i>[dd/mm/yyyy]</i>                                                                                                                                                                                                                                                                              |
| Clinical indication     | Primary staging                                                                |                                                                                                                                                                                                                                                                                                       |
| Scanner brand and model |                                                                                | <i>[free text]</i>                                                                                                                                                                                                                                                                                    |
| Scanning technique      | Number of detector rows                                                        | <i>[Numeric]</i>                                                                                                                                                                                                                                                                                      |
|                         | Precontrast scan<br><i>(*details visible only if “Yes”)</i>                    | Yes/No<br>Dual energy (Yes/No)<br>Slice thickness (mm) <i>[Numeric]</i><br>Convolution kernel(s) <i>[free text]</i><br>Body area <i>[multiple choice]</i> : <ul style="list-style-type: none"> <li>• abdomen</li> <li>• chest</li> <li>• neck</li> <li>• brain</li> </ul>                             |
|                         | Post-contrast scan<br><i>(*details repeatable for each post-contrast scan)</i> | <i>[Numeric]</i><br>Post-contrast phase(s) (arterial, venous, late)<br>Dual energy (Yes/No)<br>Slice thickness (mm) <i>[Numeric]</i><br>Convolution kernel(s) <i>[free text]</i><br>Body area <i>[multiple choice]</i> : <ul style="list-style-type: none"> <li>• abdomen</li> <li>• chest</li> </ul> |
|                         |                                                                                |                                                                                                                                                                                                                                                                                                       |

|                                                   |                             |                                                                                                                                                                                                                                       |
|---------------------------------------------------|-----------------------------|---------------------------------------------------------------------------------------------------------------------------------------------------------------------------------------------------------------------------------------|
| Bowel preparation                                 |                             | <ul style="list-style-type: none"> <li>• neck</li> <li>• brain</li> </ul>                                                                                                                                                             |
|                                                   | Yes/No                      | If Yes, specify <i>[free text]</i>                                                                                                                                                                                                    |
|                                                   | Class of radiation exposure | <i>[Numeric]</i>                                                                                                                                                                                                                      |
| CONTRAST MEDIUM                                   |                             |                                                                                                                                                                                                                                       |
| Use of contrast medium<br>(visible only if "Yes") | Si/No                       |                                                                                                                                                                                                                                       |
|                                                   | Yes/No                      |                                                                                                                                                                                                                                       |
|                                                   | Active principle            | <ul style="list-style-type: none"> <li>• Iobitridol</li> <li>• Iodixanol</li> <li>• Iohexol</li> <li>• Iomeprol</li> <li>• Iopromide</li> <li>• Ioversol</li> </ul>                                                                   |
|                                                   | Commercial name             | <i>[free text]</i>                                                                                                                                                                                                                    |
|                                                   | Volume                      | <i>[Numeric]</i> (ml)                                                                                                                                                                                                                 |
|                                                   | Flow rate                   | <i>[Numeric]</i> (ml/sec)                                                                                                                                                                                                             |
|                                                   | Concentration               | <i>[Numeric]</i> (mgI/ml)                                                                                                                                                                                                             |
|                                                   |                             |                                                                                                                                                                                                                                       |
| ADVERSE EVENTS                                    |                             |                                                                                                                                                                                                                                       |
| ONGOING adverse events<br>(visible only if "Yes") | Yes/No                      |                                                                                                                                                                                                                                       |
|                                                   | Date and hour of event      | <i>[dd/mm/yyyy, hour]</i>                                                                                                                                                                                                             |
|                                                   | Degree                      | <ul style="list-style-type: none"> <li>• Mild</li> <li>• Moderate</li> <li>• Severe</li> </ul>                                                                                                                                        |
|                                                   | Time of onset               | <ul style="list-style-type: none"> <li>• Early</li> <li>• Late</li> </ul>                                                                                                                                                             |
|                                                   |                             | Minutes <i>[Numeric]</i> (optional)                                                                                                                                                                                                   |
|                                                   | Type                        | <b>ALLERGIC / ALLERGIC-LIKE</b><br><b>Mild</b> <ul style="list-style-type: none"> <li>• Sparse wheals/itch</li> <li>• Skin edema</li> <li>• Mild itching / feeling like "velvet in the throat"</li> <li>• Nasal congestion</li> </ul> |

- Sneezing
- Conjunctivitis
- Rhinorrhea

#### **Moderate**

- Diffuse wheals/intense itch
- Diffuse skin edema
- Facial edema without dyspnea
- Feeling of choking or hoarseness
- Wheezing / mild bronchospasm without hypoxia

#### **Severe**

- Dyspnea
- Erythema – diffuse mucocutaneous symptoms
- Laryngeal edema with stridor and/or hypoxia
- Wheezing / bronchospasm
- Significant hypoxia
- Anaphylactic shock (severe hypotension and brady-tachyarrhythmia)

#### **NON-ALLERGIC**

##### **Mild**

- Mild nausea/limited vomiting
- Transient chills / heat / redness
- Headache / dizziness / anxiety / altered taste
- Slight increase in blood pressure
- Self-limiting vasovagal reaction

##### **Moderate**

- Prolonged nausea/vomiting
- Elevated arterial blood pressure
- Isolated chest pain
- Vasovagal reaction

##### **Severe**

- Treatment-refractory vasovagal reaction
- Arrhythmia
- Convulsions
- Severe arterial hypertension

#### **CONTRAST MEDIUM EXTRAVASATION**

|  |                   |                                                                                                                                                                         |
|--|-------------------|-------------------------------------------------------------------------------------------------------------------------------------------------------------------------|
|  | Type of treatment | <ul style="list-style-type: none"> <li>● Wait and see</li> <li>● Drug therapy (specify in “Notes” field)</li> <li>● Anesthesiologist’s intervention required</li> </ul> |
|  | Event resolution  | <ul style="list-style-type: none"> <li>● Spontaneous</li> <li>● After treatment</li> <li>● After hospitalization</li> <li>● Other <i>[free text]</i></li> </ul>         |
|  | Notes             | <i>[free text]</i>                                                                                                                                                      |

## REPORT

| FIELD                                                            | DETAIL                                           | ADMITTED VALUES                                                                                                                                                                                                                                                                                                                                                                                                              |
|------------------------------------------------------------------|--------------------------------------------------|------------------------------------------------------------------------------------------------------------------------------------------------------------------------------------------------------------------------------------------------------------------------------------------------------------------------------------------------------------------------------------------------------------------------------|
| <b>DIAGNOSIS</b>                                                 |                                                  |                                                                                                                                                                                                                                                                                                                                                                                                                              |
| <b>PRIMARY TUMOR</b>                                             |                                                  |                                                                                                                                                                                                                                                                                                                                                                                                                              |
| (open following fields depending on the “Site” of primary tumor) |                                                  |                                                                                                                                                                                                                                                                                                                                                                                                                              |
| <b>Lymph node disease</b>                                        | Site                                             | <ul style="list-style-type: none"> <li>● Lymph node disease</li> <li>● Bulky disease</li> <li>● Spleen</li> <li>● Extranodal disease</li> </ul>                                                                                                                                                                                                                                                                              |
|                                                                  | Number                                           | <i>[Numeric]</i>                                                                                                                                                                                                                                                                                                                                                                                                             |
|                                                                  | Site<br>(up to 2 target lesions can be selected) | <ul style="list-style-type: none"> <li>● Limited disease (stage I-II) / advanced disease (stage III-IV)</li> <li>    If “Limited disease”: <ul style="list-style-type: none"> <li>○ Supradiaphragmatic sites <i>[free text]</i></li> <li>○ Subdiaphragmatic sites <i>[free text]</i></li> </ul> </li> <li>    If “Advanced disease”: <ul style="list-style-type: none"> <li>○ site <i>[free text]</i></li> </ul> </li> </ul> |
|                                                                  | Size                                             | <ul style="list-style-type: none"> <li>● Largest dimension on axial plane (mm) <i>[Numeric]</i></li> <li>● Dimension of the axis perpendicular to the largest diameter (mm) <i>[Numeric]</i></li> </ul>                                                                                                                                                                                                                      |
|                                                                  | Reference image                                  | Number of reference image <i>[Numeric]</i><br>(with automatic link to key image)                                                                                                                                                                                                                                                                                                                                             |
|                                                                  | CT appearance                                    | <ul style="list-style-type: none"> <li>● Structure <ul style="list-style-type: none"> <li>○ areas of contrast enhancement <i>[free text]</i></li> <li>○ areas of necrosis/colliquation <i>[free text]</i></li> <li>○ other <i>[free text]</i></li> </ul> </li> <li>● Relationship with neighboring structures <i>[free text]</i></li> </ul>                                                                                  |

*\*repeat subfields for each of the target lesions selected*



|                                                                                 |                                                        |                                                                                                                                                                                                                                                                                                                                                                                                                                                                                                                                                                                                                                                                            |
|---------------------------------------------------------------------------------|--------------------------------------------------------|----------------------------------------------------------------------------------------------------------------------------------------------------------------------------------------------------------------------------------------------------------------------------------------------------------------------------------------------------------------------------------------------------------------------------------------------------------------------------------------------------------------------------------------------------------------------------------------------------------------------------------------------------------------------------|
| Bulky disease                                                                   |                                                        | <ul style="list-style-type: none"> <li>Complications <i>[free text]</i></li> </ul>                                                                                                                                                                                                                                                                                                                                                                                                                                                                                                                                                                                         |
|                                                                                 | Notes                                                  | <i>[free text]</i>                                                                                                                                                                                                                                                                                                                                                                                                                                                                                                                                                                                                                                                         |
|                                                                                 | Site                                                   | <ul style="list-style-type: none"> <li>Chest</li> <li>Abdomen</li> <li>Other <i>[free text]</i></li> </ul>                                                                                                                                                                                                                                                                                                                                                                                                                                                                                                                                                                 |
|                                                                                 | Largest dimension                                      | AP (mm) x LL (mm) x CC (mm) diameters <i>[Numeric]</i>                                                                                                                                                                                                                                                                                                                                                                                                                                                                                                                                                                                                                     |
|                                                                                 | Reference image                                        | <ul style="list-style-type: none"> <li>Number of reference image <i>[Numeric]</i> (with automatic link to key image)</li> <li>AP (mm) x LL (mm) x CC (mm) diameters on reference image <i>[Numeric]</i></li> </ul>                                                                                                                                                                                                                                                                                                                                                                                                                                                         |
|                                                                                 | CT appearance                                          | <ul style="list-style-type: none"> <li>Structure <ul style="list-style-type: none"> <li>areas of contrast enhancement <i>[free text]</i></li> <li>areas of necrosis/colliquation <i>[free text]</i></li> </ul> </li> <li>Relationship with neighboring structures <ul style="list-style-type: none"> <li>airways (displacement / compression / infiltration)</li> <li>vessels (displacement / compression / infiltration)</li> <li>other <i>[free text]</i></li> </ul> </li> <li>Complications <ul style="list-style-type: none"> <li>airway compression</li> <li>vascular compression</li> <li>vessel thrombosis</li> <li>other <i>[free text]</i></li> </ul> </li> </ul> |
| Spleen                                                                          | Notes                                                  | <i>[free text]</i>                                                                                                                                                                                                                                                                                                                                                                                                                                                                                                                                                                                                                                                         |
|                                                                                 | Largest dimension<br>(measured on longitudinal MPR)    | <ul style="list-style-type: none"> <li>normal (&lt;12cm)</li> <li>borderline high (12-13cm)</li> <li>splenomegaly (&gt;13cm)</li> </ul>                                                                                                                                                                                                                                                                                                                                                                                                                                                                                                                                    |
|                                                                                 | Structure                                              | <ul style="list-style-type: none"> <li>homogeneous</li> <li>inhomogeneous/micronodular</li> <li>focal lesions <i>[Numeric]*</i></li> </ul>                                                                                                                                                                                                                                                                                                                                                                                                                                                                                                                                 |
|                                                                                 | *if focal lesions, specify for up to 2 target lesions: | <ul style="list-style-type: none"> <li>Largest dimension on axial plane (mm) <i>[Numeric]</i></li> <li>Dimension of the axis perpendicular to the largest diameter (mm) <i>[Numeric]</i></li> <li>Number of reference image <i>[Numeric]</i> (with automatic link to key image)</li> </ul>                                                                                                                                                                                                                                                                                                                                                                                 |
| Extranodal disease<br><i>*open subfields for each extranodal site selected)</i> | Site<br>(up to 2 target lesions can be selected)       | <ul style="list-style-type: none"> <li>Limited disease (stage I-II) / advanced disease (stage III-IV) <ul style="list-style-type: none"> <li>liver</li> <li>kidney</li> <li>lung</li> </ul> </li> </ul>                                                                                                                                                                                                                                                                                                                                                                                                                                                                    |

|  |                                                        |                                                                                                                                                                                                                                                                                                                                                                                                                                                                                                                                                                                                                                                                                                                                                                                                                                                                                                                                   |
|--|--------------------------------------------------------|-----------------------------------------------------------------------------------------------------------------------------------------------------------------------------------------------------------------------------------------------------------------------------------------------------------------------------------------------------------------------------------------------------------------------------------------------------------------------------------------------------------------------------------------------------------------------------------------------------------------------------------------------------------------------------------------------------------------------------------------------------------------------------------------------------------------------------------------------------------------------------------------------------------------------------------|
|  |                                                        | <ul style="list-style-type: none"> <li>○ GI tract</li> <li>○ muscles/skin</li> <li>○ orbit</li> <li>○ CNS</li> <li>○ bone</li> <li>○ other extranodal sites</li> </ul>                                                                                                                                                                                                                                                                                                                                                                                                                                                                                                                                                                                                                                                                                                                                                            |
|  | Liver                                                  | <ul style="list-style-type: none"> <li>● Hepatomegaly (Yes/No) <ul style="list-style-type: none"> <li>○ If Yes: homogeneous / inhomogeneous</li> </ul> </li> <li>● Focal lesions <i>[Numeric]*</i></li> <li>● CT appearance <i>[free text]</i></li> </ul>                                                                                                                                                                                                                                                                                                                                                                                                                                                                                                                                                                                                                                                                         |
|  | *if focal lesions, specify for up to 2 target lesions: | <ul style="list-style-type: none"> <li>● Largest dimension on axial plane (mm) <i>[Numeric]</i></li> <li>● Dimension of the axis perpendicular to the largest diameter (mm) <i>[Numeric]</i></li> <li>● Number of reference image <i>[Numeric]</i> (with automatic link to key image)</li> </ul>                                                                                                                                                                                                                                                                                                                                                                                                                                                                                                                                                                                                                                  |
|  | Kidney                                                 | <ul style="list-style-type: none"> <li>● Unilateral / bilateral involvement</li> <li>● Hilar / perirenal / extrarenal involvement</li> <li>● Focal lesions <i>[Numeric]*</i></li> <li>● CT appearance <i>[free text]</i></li> </ul>                                                                                                                                                                                                                                                                                                                                                                                                                                                                                                                                                                                                                                                                                               |
|  | *if focal lesions, specify for up to 2 target lesions: | <ul style="list-style-type: none"> <li>● Largest dimension on axial plane (mm) <i>[Numeric]</i></li> <li>● Dimension of the axis perpendicular to the largest diameter (mm) <i>[Numeric]</i></li> <li>● Number of reference image <i>[Numeric]</i> (with automatic link to key image)</li> </ul>                                                                                                                                                                                                                                                                                                                                                                                                                                                                                                                                                                                                                                  |
|  | Lung                                                   | <ul style="list-style-type: none"> <li>● Site of lung involvement (right/left, lobe, segment)</li> <li>● CT appearance <ul style="list-style-type: none"> <li>○ Single mass (if Yes: Largest dimension on axial plane (mm) <i>[Numeric]</i>, Dimension of the axis perpendicular to the largest diameter (mm) <i>[Numeric]</i>, Number of reference image <i>[Numeric]</i> (with automatic link to key image))</li> <li>○ Multiple lesions (if Yes: Largest dimension on axial plane (mm) <i>[Numeric]</i>, Dimension of the axis perpendicular to the largest diameter (mm) <i>[Numeric]</i> for up to 2 target lesions, Number of reference image <i>[Numeric]</i> (with automatic link to key image))</li> <li>○ Consolidation</li> <li>○ Interstitial involvement</li> <li>○ Parenchymal infiltration by lymphadenopathies</li> <li>○ structure <i>[free text]</i></li> <li>○ other <i>[free text]</i></li> </ul> </li> </ul> |

|  |              |                                                                                                                                                                                                                                                                                                                                                                                                                                                                                                                                                                                                                                                                        |
|--|--------------|------------------------------------------------------------------------------------------------------------------------------------------------------------------------------------------------------------------------------------------------------------------------------------------------------------------------------------------------------------------------------------------------------------------------------------------------------------------------------------------------------------------------------------------------------------------------------------------------------------------------------------------------------------------------|
|  | GI tract     | <ul style="list-style-type: none"> <li>● Site of GI involvement (stomach, duodenum, jejunum, ileum, cecum/appendix, colon/rectum)</li> <li>● Focal lesions (if Yes: Largest dimension on axial plane (mm) <i>[Numeric]</i>, Dimension of the axis perpendicular to the largest diameter (mm) <i>[Numeric]</i> for up to 2 target lesions, Number of reference image <i>[Numeric]</i> (with automatic link to key image)</li> <li>● CT appearance <ul style="list-style-type: none"> <li>○ vegetating lesion</li> <li>○ ulcerated lesion</li> <li>○ stenosing lesion</li> <li>○ structure <i>[free text]</i></li> <li>○ other <i>[free text]</i></li> </ul> </li> </ul> |
|  | Muscles/skin | <ul style="list-style-type: none"> <li>● Site of lesions <i>[free text]</i></li> <li>● Focal lesions (if Yes: Largest dimension on axial plane (mm) <i>[Numeric]</i>, Dimension of the axis perpendicular to the largest diameter (mm) <i>[Numeric]</i> for up to 2 target lesions, Number of reference image <i>[Numeric]</i> (with automatic link to key image)</li> <li>● CT appearance <i>[free text]</i></li> </ul>                                                                                                                                                                                                                                               |
|  | Orbit        | <ul style="list-style-type: none"> <li>● Site of lesions <i>[free text]</i></li> <li>● Focal lesions (if Yes: Largest dimension on axial plane (mm) <i>[Numeric]</i>, Dimension of the axis perpendicular to the largest diameter (mm) <i>[Numeric]</i> for up to 2 target lesions, Number of reference image <i>[Numeric]</i> (with automatic link to key image)</li> <li>● CT appearance <i>[free text]</i></li> </ul>                                                                                                                                                                                                                                               |
|  | CNS          | <ul style="list-style-type: none"> <li>● Site of lesions <ul style="list-style-type: none"> <li>○ brain lobes</li> <li>○ brainstem</li> <li>○ cerebellum</li> <li>○ other <i>[free text]</i></li> </ul> </li> <li>● Focal lesions (if Yes: Largest dimension on axial plane (mm) <i>[Numeric]</i>, Dimension of the axis perpendicular to the largest diameter (mm) <i>[Numeric]</i> for up to 2 target lesions, Number of reference image <i>[Numeric]</i> (with automatic link to key image)</li> <li>● CT appearance <i>[free text]</i></li> </ul>                                                                                                                  |
|  | Bone         | <ul style="list-style-type: none"> <li>● Site of lesions <i>[free text]</i></li> <li>● Focal lesions (if Yes: Largest dimension on axial plane (mm) <i>[Numeric]</i>, Dimension of the axis perpendicular to the largest diameter (mm)</li> </ul>                                                                                                                                                                                                                                                                                                                                                                                                                      |

|                                                                                                     |                          |                                                                                                                                                                                                                                                                                                                                                                                                                                                                                                                    |
|-----------------------------------------------------------------------------------------------------|--------------------------|--------------------------------------------------------------------------------------------------------------------------------------------------------------------------------------------------------------------------------------------------------------------------------------------------------------------------------------------------------------------------------------------------------------------------------------------------------------------------------------------------------------------|
| Non-measurable lesions                                                                              |                          | <p>[Numeric] for up to 2 target lesions within soft tissue components, Number of reference image [Numeric] (with automatic link to key image)</p> <ul style="list-style-type: none"> <li>CT appearance [free text]</li> </ul>                                                                                                                                                                                                                                                                                      |
|                                                                                                     | Other extranodal sites   | <ul style="list-style-type: none"> <li>Site of lesions [free text]</li> <li>Focal lesions (if Yes: Largest dimension on axial plane (mm) [Numeric], Dimension of the axis perpendicular to the largest diameter (mm) [Numeric] for up to 2 target lesions, Number of reference image [Numeric] (with automatic link to key image)</li> <li>CT appearance [free text]</li> </ul>                                                                                                                                    |
|                                                                                                     | Yes/No<br>If Yes:        | <ul style="list-style-type: none"> <li>Pleura <ul style="list-style-type: none"> <li>effusion (thickness) [Numeric]</li> <li>nodules/thickening [free text]</li> </ul> </li> <li>Pericardium <ul style="list-style-type: none"> <li>effusion (thickness) [Numeric]</li> <li>nodules/thickening [free text]</li> </ul> </li> <li>Peritoneum <ul style="list-style-type: none"> <li>effusion (thickness) [Numeric]</li> <li>nodules/thickening [free text]</li> </ul> </li> <li>CT appearance [free text]</li> </ul> |
|                                                                                                     | TL(n)*                   | <ul style="list-style-type: none"> <li>Nodal (N) / extranodal disease (E)*</li> <li>Site*</li> <li>Number of reference image [Numeric] (with automatic link to key image)</li> <li>Size and CT appearance*</li> </ul>                                                                                                                                                                                                                                                                                              |
| SELECTED TARGET LESIONS (TL)<br>(note: n≥6 in diffuse disease)<br><i>*Repeat fields for n times</i> |                          |                                                                                                                                                                                                                                                                                                                                                                                                                                                                                                                    |
|                                                                                                     |                          |                                                                                                                                                                                                                                                                                                                                                                                                                                                                                                                    |
| TOTAL LESION BURDEN                                                                                 | Sum Product Diameter     | (mm) [Numeric]                                                                                                                                                                                                                                                                                                                                                                                                                                                                                                     |
|                                                                                                     | Volume of target lesions | (mm <sup>3</sup> ) [Numeric]                                                                                                                                                                                                                                                                                                                                                                                                                                                                                       |
| COMPLICATIONS                                                                                       |                          | <ul style="list-style-type: none"> <li>Thrombosis</li> <li>Pneumonia</li> <li>Other [free text]</li> </ul>                                                                                                                                                                                                                                                                                                                                                                                                         |
| INCIDENTAL FINDINGS                                                                                 |                          | [free text]                                                                                                                                                                                                                                                                                                                                                                                                                                                                                                        |
| NOTES                                                                                               |                          | [free text]                                                                                                                                                                                                                                                                                                                                                                                                                                                                                                        |

|                                                                           |  |                                                                                                                                              |
|---------------------------------------------------------------------------|--|----------------------------------------------------------------------------------------------------------------------------------------------|
| CONCLUSIONS<br>(note: according to Lugano revision of Ann Arbor criteria) |  | <ul style="list-style-type: none"> <li>Limited disease / Advanced disease</li> <li>Stage I-II / III-IV</li> <li>Other [free text]</li> </ul> |
|---------------------------------------------------------------------------|--|----------------------------------------------------------------------------------------------------------------------------------------------|

IMAGES

| FIELD      | DETAIL     | ADMITTED VALUES |
|------------|------------|-----------------|
| Key images | Key images | [Image]         |
